# Supplementary material for: Investigation of superspreading COVID-19 outbreak events in meat and poultry processing plants in Germany: A cross-sectional study
Source: PubMed Central journal article supplement (PMC8191887; doi:10.1371/journal.pone.0242456), 2021-06-10
Supplement: pone.0242456.s003.pdf [file pone.0242456.s003.pdf]

---

***Fragebogen zur Evaluation der Schutzmaßnahmen  
gegen Neuinfektionen durch das Corona-Virus***

---

**Informationen zur Durchführung der Befragung**

Möglicherweise müssen für einzelne Fragen verschiedene Ansprechpartner einbezogen werden.

Wenn diese keine exakten Angaben machen können, verdeutlichen Sie Ihren Ansprechpartnern, dass eine Annäherung bzw. Schätzung der tatsächlichen Zahl besser ist als keine Angabe.

**Vielen Dank für Ihre Unterstützung!**

**A. Angaben zum Unternehmen bzw. der Betriebsstätte**

|                        |  |
|------------------------|--|
| Name des Unternehmens: |  |
| Betriebsstätte:        |  |
| Adresse:               |  |

## B. Arbeitsbereiche/ Beschäftigte/ Infizierte

### 1. Arbeitsbereiche

#### 1.1 Wie viele Beschäftigte arbeiten in den folgenden Arbeitsbereichen?

*Wenn Sie keine genauen Angaben machen können, geben Sie bitte eine möglichst genaue Schätzung ab.*

| Arbeitsbereich                           | Anzahl der Beschäftigten | Anzahl der Schichten/Tag |
|------------------------------------------|--------------------------|--------------------------|
| <b>Anlieferung</b>                       |                          |                          |
| <b>Betäubung/ Anschlingen/ Einhängen</b> |                          |                          |
| <b>Schlachtung</b>                       |                          |                          |
| Schwarzbereich                           |                          |                          |
| Weißbereich                              |                          |                          |
| <b>Zerlegung</b>                         |                          |                          |
| Grobzerlegung                            |                          |                          |
| Feinzerlegung                            |                          |                          |
| <b>Fleischproduktion</b>                 |                          |                          |
| <b>Wurstproduktion</b>                   |                          |                          |
| <b>Räucherabteilung</b>                  |                          |                          |
| <b>Verpackung</b>                        |                          |                          |
| Weißbereich                              |                          |                          |
| Schwarzbereich                           |                          |                          |
| <b>Kommissionierung/ Verladung</b>       |                          |                          |
| <b>Werkstatt</b>                         |                          |                          |
| <b>Reinigung Schlachtung/Produktion</b>  |                          |                          |
| <b>Verwaltung</b>                        |                          |                          |
| <b>Sonstige</b>                          |                          |                          |
|                                          |                          |                          |
|                                          |                          |                          |

## 2. Art der Beschäftigungsverhältnisse

### 2.1 Wie viele Personen arbeiten in Ihrem Werk?

|                          | Anzahl der Beschäftigten |
|--------------------------|--------------------------|
| Stammpersonal            |                          |
| Werkvertragsarbeitnehmer |                          |
| Leiharbeitnehmer         |                          |

### 2.2 Gibt es Arbeitsbereiche, in denen keine Werkvertragsarbeitnehmer/ Leiharbeitnehmer beschäftigt sind?

|                       |               |  |
|-----------------------|---------------|--|
| <input type="radio"/> | Nein          |  |
| <input type="radio"/> | Ja, und zwar: |  |

### 2.3 Wie sind Werkvertragsarbeitnehmer/ Leiharbeitnehmer untergebracht?

|                                      | Geschätzter Anteil in Prozent |
|--------------------------------------|-------------------------------|
| Sammelunterkunft                     |                               |
| Gemeinschaftsunterkunft              |                               |
| Mietwohnung, privates Mietverhältnis |                               |

### 2.4 Mit welchem Beförderungsmittel kommen die Werksarbeitnehmer/ Leiharbeitnehmer in den Betrieb (z.B. private Anreise / Kleinbus / Sammelbus / ...)?

|  |
|--|
|  |
|--|

### 3. Infizierte Personen

3.1 Wie viele Infizierte sind Ihnen bekannt und in welchen Arbeitsbereichen waren diese beschäftigt?

| Arbeitsbereich                           | Anzahl der Infizierten |
|------------------------------------------|------------------------|
| <b>Anlieferung</b>                       |                        |
| <b>Betäubung/ Anschlingen/ Einhängen</b> |                        |
| <b>Schlachtung</b>                       |                        |
| Schwarzbereich                           |                        |
| Weißbereich                              |                        |
| <b>Zerlegung</b>                         |                        |
| Grobzerlegung                            |                        |
| Feinzerlegung                            |                        |
| <b>Fleischproduktion</b>                 |                        |
| <b>Wurstproduktion</b>                   |                        |
| <b>Räucherabteilung</b>                  |                        |
| <b>Verpackung</b>                        |                        |
| Weißbereich                              |                        |
| Schwarzbereich                           |                        |
| <b>Kommissionierung/ Verladung</b>       |                        |
| <b>Werkstatt</b>                         |                        |
| <b>Reinigung Schlachtung/Produktion</b>  |                        |
| <b>Verwaltung</b>                        |                        |
| <b>Sonstige:</b>                         |                        |
|                                          |                        |
|                                          |                        |

### 3.2 Wie viele infizierte Werkvertragsarbeitnehmer/Leiharbeiter wohnen in den folgenden Unterkunftsarten?

|                                              | Infizierte | Gesamtzahl |
|----------------------------------------------|------------|------------|
| <b>Sammelunterkunft</b>                      |            |            |
| <b>Gemeinschaftsunterkunft</b>               |            |            |
| <b>Mietwohnung, privates Mietsverhältnis</b> |            |            |

## C. Umgebungsbedingungen/ Lüftung/ Klima

### C1. Welche Arbeitsbereiche sind mit einer raumluftechnischen Anlage (RLT) mit Außenluftzufuhr versehen?

| Arbeitsbereich                           | RLT vorhanden            | Außenluftanteil in % | Umluftanteil in % |
|------------------------------------------|--------------------------|----------------------|-------------------|
| <b>Anlieferung</b>                       | <input type="checkbox"/> |                      |                   |
| <b>Betäubung/ Anschlingen/ Einhängen</b> | <input type="checkbox"/> |                      |                   |
| <b>Schlachtung</b>                       | <input type="checkbox"/> |                      |                   |
| Schwarzbereich                           | <input type="checkbox"/> |                      |                   |
| Weißbereich                              | <input type="checkbox"/> |                      |                   |
| <b>Zerlegung</b>                         | <input type="checkbox"/> |                      |                   |
| Grobzerlegung                            | <input type="checkbox"/> |                      |                   |
| Feinzerlegung                            | <input type="checkbox"/> |                      |                   |
| <b>Fleischproduktion</b>                 | <input type="checkbox"/> |                      |                   |
| <b>Wurstproduktion</b>                   | <input type="checkbox"/> |                      |                   |
| <b>Räucherabteilung</b>                  | <input type="checkbox"/> |                      |                   |
| <b>Verpackung</b>                        | <input type="checkbox"/> |                      |                   |
| Weißbereich                              | <input type="checkbox"/> |                      |                   |
| Schwarzbereich                           | <input type="checkbox"/> |                      |                   |
| <b>Kommissionierung/ Verladung</b>       | <input type="checkbox"/> |                      |                   |
| <b>Werkstatt</b>                         | <input type="checkbox"/> |                      |                   |

| Arbeitsbereich                              | RLT<br>vorhanden         | Außenluft-<br>anteil in % | Umluft-<br>anteil in % |
|---------------------------------------------|--------------------------|---------------------------|------------------------|
| <b>Reinigung<br/>Schlachtung/Produktion</b> | <input type="checkbox"/> |                           |                        |
| <b>Verwaltung</b>                           | <input type="checkbox"/> |                           |                        |
| <b>Sonstige:</b>                            |                          |                           |                        |
|                                             | <input type="checkbox"/> |                           |                        |
|                                             | <input type="checkbox"/> |                           |                        |

## C2. Welche Arbeitsbereiche werden auf welche Temperatur gekühlt?

| Arbeitsbereich                           | Temperatur [°C] |
|------------------------------------------|-----------------|
| <b>Anlieferung</b>                       |                 |
| <b>Betäubung/ Anschlingen/ Einhängen</b> |                 |
| <b>Schlachtung</b>                       |                 |
| Schwarzbereich                           |                 |
| Weißbereich                              |                 |
| <b>Zerlegung</b>                         |                 |
| Grobzerlegung                            |                 |
| Feinzerlegung                            |                 |
| <b>Fleischproduktion</b>                 |                 |
| <b>Wurstproduktion</b>                   |                 |
| <b>Räucherabteilung</b>                  |                 |
| <b>Verpackung</b>                        |                 |
| Weißbereich                              |                 |
| Schwarzbereich                           |                 |
| <b>Kommissionierung/ Verladung</b>       |                 |
| <b>Werkstatt</b>                         |                 |
| <b>Reinigung Schlachtung/Produktion</b>  |                 |

| Arbeitsbereich | Temperatur [°C] |
|----------------|-----------------|
| Verwaltung     |                 |
| Sonstige:      |                 |
|                |                 |
|                |                 |

**C3. Wie hoch ist der maximale Außenluftanteil im gekühlten Arbeitsbereich im Sommer/ im Winter?**

|                                       | Max. Außenluftanteil in % |
|---------------------------------------|---------------------------|
| Sommersituation (hohe Temperaturen)   |                           |
| Wintersituation (niedrige Temperatur) |                           |

**C4. In welchen Arbeitsbereichen wird die Raumluft mit welchem Verfahren behandelt? (Filtration, UV-Strahlung, chemische Verfahren...o.ä.)**

| Arbeitsbereich                    | Behandlungsart |
|-----------------------------------|----------------|
| Anlieferung                       |                |
| Betäubung/ Anschlingen/ Einhängen |                |
| Schlachtung                       |                |
| Schwarzbereich                    |                |
| Weißbereich                       |                |
| Zerlegung                         |                |
| Grobzerlegung                     |                |
| Feinzerlegung                     |                |
| Fleischproduktion                 |                |
| Wurstproduktion                   |                |
| Räucherabteilung                  |                |
| Verpackung                        |                |
| Weißbereich                       |                |

| Arbeitsbereich                   | Behandlungsart |
|----------------------------------|----------------|
| Schwarzbereich                   |                |
| Kommissionierung/ Verladung      |                |
| Werkstatt                        |                |
| Reinigung Schlachtung/Produktion |                |
| Verwaltung                       |                |
| Sonstige:                        |                |
|                                  |                |
|                                  |                |

#### C5. Wie werden die folgenden Räume belüftet?

|              | RLT-Anlage               | Natürliche Lüftung<br>(Fenster, Türen) |
|--------------|--------------------------|----------------------------------------|
| Kantine      | <input type="checkbox"/> | <input type="checkbox"/>               |
| Pausenräume  | <input type="checkbox"/> | <input type="checkbox"/>               |
| Umkleieräume | <input type="checkbox"/> | <input type="checkbox"/>               |
| Sanitärräume | <input type="checkbox"/> | <input type="checkbox"/>               |

## D. Organisatorische und persönliche Schutzmaßnahmen

#### D1. Für welche Arbeitsbereiche gibt es feste Pausenzeiten?

| Arbeitsbereich                    | Keine feste Pausenzeit | Feste Pausenzeit, zeitlich nicht versetzt | Feste Pausenzeiten, zeitlich versetzt |
|-----------------------------------|------------------------|-------------------------------------------|---------------------------------------|
| Anlieferung                       | <input type="radio"/>  | <input type="radio"/>                     | <input type="radio"/>                 |
| Betäubung/ Anschlingen/ Einhängen | <input type="radio"/>  | <input type="radio"/>                     | <input type="radio"/>                 |
| Schlachtung                       | <input type="radio"/>  | <input type="radio"/>                     | <input type="radio"/>                 |
| Schwarzbereich                    | <input type="radio"/>  | <input type="radio"/>                     | <input type="radio"/>                 |
| Weißbereich                       | <input type="radio"/>  | <input type="radio"/>                     | <input type="radio"/>                 |
| Zerlegung                         | <input type="radio"/>  | <input type="radio"/>                     | <input type="radio"/>                 |



| Arbeitsbereich                          | Keine feste Pausenzeit | Feste Pausenzeit, zeitlich nicht versetzt | Feste Pausenzeiten, zeitlich versetzt |
|-----------------------------------------|------------------------|-------------------------------------------|---------------------------------------|
| Grobzerlegung                           | <input type="radio"/>  | <input type="radio"/>                     | <input type="radio"/>                 |
| Feinzerlegung                           | <input type="radio"/>  | <input type="radio"/>                     | <input type="radio"/>                 |
| <b>Fleischproduktion</b>                | <input type="radio"/>  | <input type="radio"/>                     | <input type="radio"/>                 |
| <b>Wurstproduktion</b>                  | <input type="radio"/>  | <input type="radio"/>                     | <input type="radio"/>                 |
| <b>Räucherabteilung</b>                 | <input type="radio"/>  | <input type="radio"/>                     | <input type="radio"/>                 |
| <b>Verpackung</b>                       | <input type="radio"/>  | <input type="radio"/>                     | <input type="radio"/>                 |
| Weißbereich                             | <input type="radio"/>  | <input type="radio"/>                     | <input type="radio"/>                 |
| Schwarzbereich                          | <input type="radio"/>  | <input type="radio"/>                     | <input type="radio"/>                 |
| <b>Kommissionierung/ Verladung</b>      | <input type="radio"/>  | <input type="radio"/>                     | <input type="radio"/>                 |
| <b>Werkstatt</b>                        | <input type="radio"/>  | <input type="radio"/>                     | <input type="radio"/>                 |
| <b>Reinigung Schlachtung/Produktion</b> | <input type="radio"/>  | <input type="radio"/>                     | <input type="radio"/>                 |
| <b>Verwaltung</b>                       | <input type="radio"/>  | <input type="radio"/>                     | <input type="radio"/>                 |
| <b>Sonstige:</b>                        |                        |                                           |                                       |
|                                         | <input type="radio"/>  | <input type="radio"/>                     | <input type="radio"/>                 |
|                                         | <input type="radio"/>  | <input type="radio"/>                     | <input type="radio"/>                 |

**D2. Wie werden die Abstandsregelungen (1,5 m) in den Pausenräumen/Kantine umgesetzt?**

**D3. In welchen Arbeitsbereichen wird der Mindestabstand von 1,5m nicht eingehalten?**

| <b>Arbeitsbereich</b>                            | <b>Abstand mind. 1,5m</b> | <b>Abstand weniger als 1,5m</b> | <b>Wenn Abstand &lt;1,5m: Welche Maßnahmen werden ergriffen?</b> |
|--------------------------------------------------|---------------------------|---------------------------------|------------------------------------------------------------------|
| <b>Anlieferung</b>                               | <input type="checkbox"/>  | <input type="checkbox"/>        |                                                                  |
| <b>Betäubung/<br/>Anschlingen/<br/>Einhängen</b> | <input type="checkbox"/>  | <input type="checkbox"/>        |                                                                  |
| <b>Schlachtung</b>                               | <input type="checkbox"/>  | <input type="checkbox"/>        |                                                                  |
| Schwarzbereich                                   | <input type="checkbox"/>  | <input type="checkbox"/>        |                                                                  |
| Weißbereich                                      | <input type="checkbox"/>  | <input type="checkbox"/>        |                                                                  |
| <b>Zerlegung</b>                                 | <input type="checkbox"/>  | <input type="checkbox"/>        |                                                                  |
| Grobzerlegung                                    | <input type="checkbox"/>  | <input type="checkbox"/>        |                                                                  |
| Feinzerlegung                                    | <input type="checkbox"/>  | <input type="checkbox"/>        |                                                                  |
| <b>Fleischproduktion</b>                         | <input type="checkbox"/>  | <input type="checkbox"/>        |                                                                  |
| <b>Wurstproduktion</b>                           | <input type="checkbox"/>  | <input type="checkbox"/>        |                                                                  |
| <b>Räucherabteilung</b>                          | <input type="checkbox"/>  | <input type="checkbox"/>        |                                                                  |
| <b>Verpackung</b>                                | <input type="checkbox"/>  | <input type="checkbox"/>        |                                                                  |

| Arbeitsbereich                      | Abstand mind. 1,5m       | Abstand weniger als 1,5m | Wenn Abstand <1,5m: Welche Maßnahmen werden ergriffen? |
|-------------------------------------|--------------------------|--------------------------|--------------------------------------------------------|
| Weißbereich                         | <input type="checkbox"/> | <input type="checkbox"/> |                                                        |
| Schwarzbereich                      | <input type="checkbox"/> | <input type="checkbox"/> |                                                        |
| Kommissionierung/<br>Verladung      | <input type="checkbox"/> | <input type="checkbox"/> |                                                        |
| Werkstatt                           | <input type="checkbox"/> | <input type="checkbox"/> |                                                        |
| Reinigung<br>Schlachtung/Produktion | <input type="checkbox"/> | <input type="checkbox"/> |                                                        |
| Verwaltung                          | <input type="checkbox"/> | <input type="checkbox"/> |                                                        |
| <b>Sonstige:</b>                    |                          |                          |                                                        |
|                                     | <input type="checkbox"/> | <input type="checkbox"/> |                                                        |
|                                     | <input type="checkbox"/> | <input type="checkbox"/> |                                                        |

**D4. In welchen Arbeitsbereichen gab bzw. gibt es eine Tragepflicht für Mund-Nase-Bedeckung?**

| Arbeitsbereich                    | Vor Corona               | Nach Corona              |
|-----------------------------------|--------------------------|--------------------------|
| Anlieferung                       | <input type="checkbox"/> | <input type="checkbox"/> |
| Betäubung/ Anschlingen/ Einhängen | <input type="checkbox"/> | <input type="checkbox"/> |
| Schlachtung                       | <input type="checkbox"/> | <input type="checkbox"/> |
| Schwarzbereich                    | <input type="checkbox"/> | <input type="checkbox"/> |
| Weißbereich                       | <input type="checkbox"/> | <input type="checkbox"/> |
| Zerlegung                         | <input type="checkbox"/> | <input type="checkbox"/> |

| Arbeitsbereich                          | Vor Corona               | Nach Corona              |
|-----------------------------------------|--------------------------|--------------------------|
| Grobzerlegung                           | <input type="checkbox"/> | <input type="checkbox"/> |
| Feinzerlegung                           | <input type="checkbox"/> | <input type="checkbox"/> |
| <b>Fleischproduktion</b>                | <input type="checkbox"/> | <input type="checkbox"/> |
| <b>Wurstproduktion</b>                  | <input type="checkbox"/> | <input type="checkbox"/> |
| <b>Räucherabteilung</b>                 | <input type="checkbox"/> | <input type="checkbox"/> |
| <b>Verpackung</b>                       | <input type="checkbox"/> | <input type="checkbox"/> |
| Weißbereich                             | <input type="checkbox"/> | <input type="checkbox"/> |
| Schwarzbereich                          | <input type="checkbox"/> | <input type="checkbox"/> |
| <b>Kommissionierung/ Verladung</b>      | <input type="checkbox"/> | <input type="checkbox"/> |
| <b>Werkstatt</b>                        | <input type="checkbox"/> | <input type="checkbox"/> |
| <b>Reinigung Schlachtung/Produktion</b> | <input type="checkbox"/> | <input type="checkbox"/> |
| <b>Verwaltung</b>                       | <input type="checkbox"/> | <input type="checkbox"/> |
| <b>Sonstige</b>                         |                          |                          |
|                                         | <input type="checkbox"/> | <input type="checkbox"/> |
|                                         | <input type="checkbox"/> | <input type="checkbox"/> |

#### D5. Welche Art von Mund-Nasen-Bedeckung wird aktuell getragen?

|                          |                          |
|--------------------------|--------------------------|
| Medizinischer Mundschutz | <input type="checkbox"/> |
| Einweg-Astro-Haube       | <input type="checkbox"/> |
| FFP2                     | <input type="checkbox"/> |
| Sonstige, und zwar:      | <input type="checkbox"/> |
|                          |                          |

**D6. Beschreiben Sie das Konzept zur Wahrung des Abstandgebotes in Umkleieräumen. Wird es bereits umgesetzt?**

**D7. Gibt es zusätzliche Maßnahmen, um die Anzahl der Kontakte der Mitarbeiter ab dem Einlass am Werkstor herabzusetzen?**

Bitte senden Sie den ausgefüllten Fragebogen an:

[Isabel.Dienstbuehl@bgn.de](mailto:Isabel.Dienstbuehl@bgn.de)

oder

Berufsgenossenschaft Nahrungsmittel und Gastgewerbe  
Präventionsleitung  
Isabel Dienstbühl  
Dynamostr. 7-11  
68165 Mannheim
