# Supplementary material for: Investigation of superspreading COVID-19 outbreak events in meat and poultry processing plants in Germany: A cross-sectional study
Source: PubMed Central journal article supplement (PMC8191887; doi:10.1371/journal.pone.0242456), 2021-06-10
Supplement: pone.0242456.s004.pdf [file pone.0242456.s004.pdf]

---

***Fragebogen zur Evaluation der Schutzmaßnahmen  
gegen Neuinfektionen durch das Corona-Virus (V3)***

---

**Informationen zur Durchführung der Befragung**

Möglicherweise müssen für einzelne Fragen verschiedene Ansprechpartner einbezogen werden.

Wenn diese keine exakten Angaben machen können, verdeutlichen Sie Ihren Ansprechpartnern, dass eine Annäherung bzw. Schätzung der tatsächlichen Zahl besser ist als keine Angabe.

**Vielen Dank für Ihre Unterstützung!**

**A. Angaben zum Unternehmen bzw. der Betriebsstätte**

|                        |  |
|------------------------|--|
| Name des Unternehmens: |  |
| Betriebsstätte:        |  |
| Adresse:               |  |

## B. Arbeitsbereiche/ Beschäftigte/ Infizierte

### B1. Arbeitsbereiche

#### B1.1 Wie viele Beschäftigte arbeiten in den folgenden Arbeitsbereichen?

Wenn Sie keine genauen Angaben machen können, geben Sie bitte eine möglichst genaue Schätzung ab.

| Arbeitsbereich                           | Anzahl der Beschäftigten | ...davon Stamm-personal | Anzahl der Schichten/Tag |
|------------------------------------------|--------------------------|-------------------------|--------------------------|
| <b>Anlieferung</b>                       |                          |                         |                          |
| <b>Betäubung/ Anschlingen/ Einhängen</b> |                          |                         |                          |
| <b>Schlachtung</b>                       |                          |                         |                          |
| Schwarzbereich                           |                          |                         |                          |
| Weißbereich                              |                          |                         |                          |
| <b>Zerlegung</b>                         |                          |                         |                          |
| Grobzerlegung                            |                          |                         |                          |
| Feinzerlegung                            |                          |                         |                          |
| <b>Fleischproduktion</b>                 |                          |                         |                          |
| <b>Wurstproduktion</b>                   |                          |                         |                          |
| <b>Räucherabteilung</b>                  |                          |                         |                          |
| <b>Verpackung</b>                        |                          |                         |                          |
| Weißbereich                              |                          |                         |                          |
| Schwarzbereich                           |                          |                         |                          |
| <b>Kommissionierung/ Verladung</b>       |                          |                         |                          |
| <b>Werkstatt</b>                         |                          |                         |                          |
| <b>Reinigung Schlachtung/Produktion</b>  |                          |                         |                          |
| <b>Verwaltung</b>                        |                          |                         |                          |
| <b>Sonstige</b>                          |                          |                         |                          |
|                                          |                          |                         |                          |
|                                          |                          |                         |                          |
| <b>SUMME BESCHÄFTIGTE:</b>               |                          |                         |                          |

## B2. Art der Beschäftigungsverhältnisse

### B2.1 Wie viele Personen arbeiten in Ihrem Werk?

Wenn Sie keine genauen Angaben machen können, geben Sie bitte eine möglichst genaue Schätzung ab.

|                          | Anzahl der Beschäftigten |
|--------------------------|--------------------------|
| Stammpersonal            |                          |
| Werkvertragsarbeitnehmer |                          |
| Leiharbeitnehmer         |                          |

### B2.2 Gibt es Arbeitsbereiche, in denen keine Werkvertragsarbeitnehmer/ Leiharbeitnehmer beschäftigt sind?

|                       |               |  |
|-----------------------|---------------|--|
| <input type="radio"/> | Nein          |  |
| <input type="radio"/> | Ja, und zwar: |  |

### B2.3 Wie sind Werkvertragsarbeitnehmer/ Leiharbeitnehmer untergebracht?

Wenn Sie keine genauen Angaben machen können, geben Sie bitte eine möglichst genaue Schätzung ab.

|                                      | Anzahl der Beschäftigten |
|--------------------------------------|--------------------------|
| Sammelunterkunft                     |                          |
| Gemeinschaftsunterkunft              |                          |
| Mietwohnung, privates Mietverhältnis |                          |

### B2.4 Mit welchem Beförderungsmittel kommen die Werksarbeitnehmer/ Leiharbeitnehmer in den Betrieb (z.B. private Anreise / Kleinbus / Sammelbus / ...)?

|  |
|--|
|  |
|--|

### B3. Infizierte Personen

**B3.1 An welchem Datum haben Sie zum ersten Mal von einem infizierten Mitarbeiter erfahren? Wie ist diese Information zu Ihnen gelangt?**

**B3.2 Welche Maßnahmen wurden ergriffen, nachdem bekannt wurde, dass es in ihrem Betrieb mind. einen mit SARS-CoV-2 infizierten Mitarbeiter gibt?**

**Sollten in Ihrem Unternehmen noch keine infizierten Mitarbeiter aufgetreten sein: Gibt es einen Maßnahmenplan und wenn ja, was sieht er vor?**

***kurzfristig:** innerhalb weniger Stunden bis zu sieben Tage, z.B. Quarantäne, Schließung von Produktionslinien/ Abteilungen*

***langfristig:** innerhalb weniger Wochen umgesetzt, z.B. Reihentestungen, Nachrüsten von Lüftungsanlagen)*

| Art der Maßnahme | kurzfristig umgesetzt    | langfristig umgesetzt    | geplant                  |
|------------------|--------------------------|--------------------------|--------------------------|
|                  | <input type="checkbox"/> | <input type="checkbox"/> | <input type="checkbox"/> |
|                  | <input type="checkbox"/> | <input type="checkbox"/> | <input type="checkbox"/> |
|                  | <input type="checkbox"/> | <input type="checkbox"/> | <input type="checkbox"/> |
|                  | <input type="checkbox"/> | <input type="checkbox"/> | <input type="checkbox"/> |
|                  | <input type="checkbox"/> | <input type="checkbox"/> | <input type="checkbox"/> |

**B3.3 Wie viele Infizierte sind Ihnen bekannt und in welchen Arbeitsbereichen waren diese beschäftigt?**

| Arbeitsbereich                           | Anzahl der Infizierten | ...davon Stammpersonal |
|------------------------------------------|------------------------|------------------------|
| <b>Anlieferung</b>                       |                        |                        |
| <b>Betäubung/ Anschlingen/ Einhängen</b> |                        |                        |
| <b>Schlachtung</b>                       |                        |                        |
| Schwarzbereich                           |                        |                        |
| Weißbereich                              |                        |                        |
| <b>Zerlegung</b>                         |                        |                        |

| <b>Arbeitsbereich</b>                   | <b>Anzahl der Infizierten</b> | <b>...davon Stammpersonal</b> |
|-----------------------------------------|-------------------------------|-------------------------------|
| Grobzerlegung                           |                               |                               |
| Feinzerlegung                           |                               |                               |
| <b>Fleischproduktion</b>                |                               |                               |
| <b>Wurstproduktion</b>                  |                               |                               |
| <b>Räucherabteilung</b>                 |                               |                               |
| <b>Verpackung</b>                       |                               |                               |
| Weißbereich                             |                               |                               |
| Schwarzbereich                          |                               |                               |
| <b>Kommissionierung/ Verladung</b>      |                               |                               |
| <b>Werkstatt</b>                        |                               |                               |
| <b>Reinigung Schlachtung/Produktion</b> |                               |                               |
| <b>Verwaltung</b>                       |                               |                               |
| <b>Sonstige:</b>                        |                               |                               |
|                                         |                               |                               |
|                                         |                               |                               |

**B3.4 Wie viele infizierte Werkvertragsarbeitnehmer/Leiharbeiter wohnen in den folgenden Unterkunftsarten?**

|                                              | <b>Anzahl Infizierte</b> |
|----------------------------------------------|--------------------------|
| <b>Sammelunterkunft</b>                      |                          |
| <b>Gemeinschaftsunterkunft</b>               |                          |
| <b>Mietwohnung, privates Mietsverhältnis</b> |                          |

## C. Umgebungsbedingungen/ Lüftung/ Klima

C1. Welche Arbeitsbereiche sind mit einer raumluftechnischen Anlage (RLT) mit Außenluftzufuhr versehen?

| Arbeitsbereich                           | RLT vorhanden            | Außenluftvolumenstrom [m <sup>3</sup> /h] | Umluftführung möglich    |
|------------------------------------------|--------------------------|-------------------------------------------|--------------------------|
| <b>Anlieferung</b>                       | <input type="checkbox"/> |                                           | <input type="checkbox"/> |
| <b>Betäubung/ Anschlingen/ Einhängen</b> | <input type="checkbox"/> |                                           | <input type="checkbox"/> |
| <b>Schlachtung</b>                       | <input type="checkbox"/> |                                           | <input type="checkbox"/> |
| Schwarzbereich                           | <input type="checkbox"/> |                                           | <input type="checkbox"/> |
| Weißbereich                              | <input type="checkbox"/> |                                           | <input type="checkbox"/> |
| <b>Zerlegung</b>                         | <input type="checkbox"/> |                                           | <input type="checkbox"/> |
| Grobzerlegung                            | <input type="checkbox"/> |                                           | <input type="checkbox"/> |
| Feinzerlegung                            | <input type="checkbox"/> |                                           | <input type="checkbox"/> |
| <b>Fleischproduktion</b>                 | <input type="checkbox"/> |                                           | <input type="checkbox"/> |
| <b>Wurstproduktion</b>                   | <input type="checkbox"/> |                                           | <input type="checkbox"/> |
| <b>Räucherabteilung</b>                  | <input type="checkbox"/> |                                           | <input type="checkbox"/> |
| <b>Verpackung</b>                        | <input type="checkbox"/> |                                           | <input type="checkbox"/> |
| Weißbereich                              | <input type="checkbox"/> |                                           | <input type="checkbox"/> |
| Schwarzbereich                           | <input type="checkbox"/> |                                           | <input type="checkbox"/> |
| <b>Kommissionierung/ Verladung</b>       | <input type="checkbox"/> |                                           | <input type="checkbox"/> |
| <b>Werkstatt</b>                         | <input type="checkbox"/> |                                           |                          |
| <b>Reinigung Schlachtung/Produktion</b>  | <input type="checkbox"/> |                                           |                          |
| <b>Verwaltung</b>                        | <input type="checkbox"/> |                                           |                          |
| <b>Sonstige:</b>                         |                          |                                           |                          |
|                                          | <input type="checkbox"/> |                                           |                          |
|                                          | <input type="checkbox"/> |                                           |                          |

## C2. Welche Arbeitsbereiche werden auf welche Temperatur gekühlt?

| Arbeitsbereich                           | Temperatur [°C] |
|------------------------------------------|-----------------|
| <b>Anlieferung</b>                       |                 |
| <b>Betäubung/ Anschlingen/ Einhängen</b> |                 |
| <b>Schlachtung</b>                       |                 |
| Schwarzbereich                           |                 |
| Weißbereich                              |                 |
| <b>Zerlegung</b>                         |                 |
| Grobzerlegung                            |                 |
| Feinzerlegung                            |                 |
| <b>Fleischproduktion</b>                 |                 |
| <b>Wurstproduktion</b>                   |                 |
| <b>Räucherabteilung</b>                  |                 |
| <b>Verpackung</b>                        |                 |
| Weißbereich                              |                 |
| Schwarzbereich                           |                 |
| <b>Kommissionierung/ Verladung</b>       |                 |
| <b>Werkstatt</b>                         |                 |
| <b>Reinigung Schlachtung/Produktion</b>  |                 |
| <b>Verwaltung</b>                        |                 |
| <b>Sonstige:</b>                         |                 |
|                                          |                 |
|                                          |                 |

### C3. Wie wird die Kühlung erreicht?

| Arbeitsbereich                           | Dezentrale Umluftkühlung (Sekundärluft) | Zentrale Kühlung der Außenluft über eine RLT-Anlage |                          |
|------------------------------------------|-----------------------------------------|-----------------------------------------------------|--------------------------|
|                                          |                                         | ohne Umluftanteil                                   | mit Umluftanteil         |
| <b>Anlieferung</b>                       | <input type="checkbox"/>                | <input type="checkbox"/>                            | <input type="checkbox"/> |
| <b>Betäubung/ Anschlingen/ Einhängen</b> | <input type="checkbox"/>                | <input type="checkbox"/>                            | <input type="checkbox"/> |
| <b>Schlachtung</b>                       | <input type="checkbox"/>                | <input type="checkbox"/>                            | <input type="checkbox"/> |
| Schwarzbereich                           | <input type="checkbox"/>                | <input type="checkbox"/>                            | <input type="checkbox"/> |
| Weißbereich                              | <input type="checkbox"/>                | <input type="checkbox"/>                            | <input type="checkbox"/> |
| <b>Zerlegung</b>                         | <input type="checkbox"/>                | <input type="checkbox"/>                            | <input type="checkbox"/> |
| Grobzerlegung                            | <input type="checkbox"/>                | <input type="checkbox"/>                            | <input type="checkbox"/> |
| Feinzerlegung                            | <input type="checkbox"/>                | <input type="checkbox"/>                            | <input type="checkbox"/> |
| <b>Fleischproduktion</b>                 | <input type="checkbox"/>                | <input type="checkbox"/>                            | <input type="checkbox"/> |
| <b>Wurstproduktion</b>                   | <input type="checkbox"/>                | <input type="checkbox"/>                            | <input type="checkbox"/> |
| <b>Räucherabteilung</b>                  | <input type="checkbox"/>                | <input type="checkbox"/>                            | <input type="checkbox"/> |
| <b>Verpackung</b>                        | <input type="checkbox"/>                | <input type="checkbox"/>                            | <input type="checkbox"/> |
| Weißbereich                              | <input type="checkbox"/>                | <input type="checkbox"/>                            | <input type="checkbox"/> |
| Schwarzbereich                           | <input type="checkbox"/>                | <input type="checkbox"/>                            | <input type="checkbox"/> |
| <b>Kommissionierung/ Verladung</b>       | <input type="checkbox"/>                | <input type="checkbox"/>                            | <input type="checkbox"/> |
| <b>Werkstatt</b>                         | <input type="checkbox"/>                | <input type="checkbox"/>                            | <input type="checkbox"/> |
| <b>Reinigung Schlachtung/Produktion</b>  | <input type="checkbox"/>                | <input type="checkbox"/>                            | <input type="checkbox"/> |
| <b>Verwaltung</b>                        | <input type="checkbox"/>                | <input type="checkbox"/>                            | <input type="checkbox"/> |
| <b>Sonstige:</b>                         |                                         |                                                     |                          |
|                                          | <input type="checkbox"/>                | <input type="checkbox"/>                            | <input type="checkbox"/> |
|                                          | <input type="checkbox"/>                | <input type="checkbox"/>                            | <input type="checkbox"/> |



#### C4. Mit welcher Technik wird die gekühlte Umluft gereinigt?

| Arbeitsbereich           | Dezentrale Umluftkühlung (Sekundärluft) |                          | Umluftluftanteil der RLT-Anlage |                          | separate Umluftentkeimung     |                          |
|--------------------------|-----------------------------------------|--------------------------|---------------------------------|--------------------------|-------------------------------|--------------------------|
|                          | Filtration (wenn ja, welche?)           | UVC                      | Filtration (wenn ja, welche?)   | UVC                      | Filtration (wenn ja, welche?) | UVC                      |
| <b>Zerlegung</b>         | <input type="checkbox"/>                | <input type="checkbox"/> | <input type="checkbox"/>        | <input type="checkbox"/> | <input type="checkbox"/>      | <input type="checkbox"/> |
| Grobzerlegung            | <input type="checkbox"/>                | <input type="checkbox"/> | <input type="checkbox"/>        | <input type="checkbox"/> | <input type="checkbox"/>      | <input type="checkbox"/> |
| Feinzerlegung            | <input type="checkbox"/>                | <input type="checkbox"/> | <input type="checkbox"/>        | <input type="checkbox"/> | <input type="checkbox"/>      | <input type="checkbox"/> |
| <b>Fleischproduktion</b> | <input type="checkbox"/>                | <input type="checkbox"/> | <input type="checkbox"/>        | <input type="checkbox"/> | <input type="checkbox"/>      | <input type="checkbox"/> |
| <b>Wurstproduktion</b>   | <input type="checkbox"/>                | <input type="checkbox"/> | <input type="checkbox"/>        | <input type="checkbox"/> | <input type="checkbox"/>      | <input type="checkbox"/> |
| <b>Verpackung</b>        | <input type="checkbox"/>                | <input type="checkbox"/> | <input type="checkbox"/>        | <input type="checkbox"/> | <input type="checkbox"/>      | <input type="checkbox"/> |
| Weißbereich              | <input type="checkbox"/>                | <input type="checkbox"/> | <input type="checkbox"/>        | <input type="checkbox"/> | <input type="checkbox"/>      | <input type="checkbox"/> |
| Schwarzbereich           | <input type="checkbox"/>                | <input type="checkbox"/> | <input type="checkbox"/>        | <input type="checkbox"/> | <input type="checkbox"/>      | <input type="checkbox"/> |

#### C5. Wie werden die folgenden Räume belüftet?

|                     | RLT-Anlage               | Natürliche Lüftung (Fenster, Türen) |
|---------------------|--------------------------|-------------------------------------|
| <b>Kantine</b>      | <input type="checkbox"/> | <input type="checkbox"/>            |
| <b>Pausenräume</b>  | <input type="checkbox"/> | <input type="checkbox"/>            |
| <b>Umkleieräume</b> | <input type="checkbox"/> | <input type="checkbox"/>            |
| <b>Sanitärräume</b> | <input type="checkbox"/> | <input type="checkbox"/>            |

## D. Organisatorische und persönliche Schutzmaßnahmen

### D1. Für welche Arbeitsbereiche gibt es feste Pausenzeiten?

| Arbeitsbereich                           | Keine feste Pausenzeit   | Feste Pausenzeit, zeitlich nicht versetzt | Feste Pausenzeiten, zeitlich versetzt |
|------------------------------------------|--------------------------|-------------------------------------------|---------------------------------------|
| <b>Anlieferung</b>                       | <input type="checkbox"/> | <input type="checkbox"/>                  | <input type="checkbox"/>              |
| <b>Betäubung/ Anschlingen/ Einhängen</b> | <input type="checkbox"/> | <input type="checkbox"/>                  | <input type="checkbox"/>              |
| <b>Schlachtung</b>                       | <input type="checkbox"/> | <input type="checkbox"/>                  | <input type="checkbox"/>              |
| Schwarzbereich                           | <input type="checkbox"/> | <input type="checkbox"/>                  | <input type="checkbox"/>              |
| Weißbereich                              | <input type="checkbox"/> | <input type="checkbox"/>                  | <input type="checkbox"/>              |
| <b>Zerlegung</b>                         | <input type="checkbox"/> | <input type="checkbox"/>                  | <input type="checkbox"/>              |
| Grobzerlegung                            | <input type="checkbox"/> | <input type="checkbox"/>                  | <input type="checkbox"/>              |
| Feinzerlegung                            | <input type="checkbox"/> | <input type="checkbox"/>                  | <input type="checkbox"/>              |
| <b>Fleischproduktion</b>                 | <input type="checkbox"/> | <input type="checkbox"/>                  | <input type="checkbox"/>              |
| <b>Wurstproduktion</b>                   | <input type="checkbox"/> | <input type="checkbox"/>                  | <input type="checkbox"/>              |
| <b>Räucherabteilung</b>                  | <input type="checkbox"/> | <input type="checkbox"/>                  | <input type="checkbox"/>              |
| <b>Verpackung</b>                        | <input type="checkbox"/> | <input type="checkbox"/>                  | <input type="checkbox"/>              |
| Weißbereich                              | <input type="checkbox"/> | <input type="checkbox"/>                  | <input type="checkbox"/>              |
| Schwarzbereich                           | <input type="checkbox"/> | <input type="checkbox"/>                  | <input type="checkbox"/>              |
| <b>Kommissionierung/ Verladung</b>       | <input type="checkbox"/> | <input type="checkbox"/>                  | <input type="checkbox"/>              |
| <b>Werkstatt</b>                         | <input type="checkbox"/> | <input type="checkbox"/>                  | <input type="checkbox"/>              |
| <b>Reinigung Schlachtung/Produktion</b>  | <input type="checkbox"/> | <input type="checkbox"/>                  | <input type="checkbox"/>              |
| <b>Verwaltung</b>                        | <input type="checkbox"/> | <input type="checkbox"/>                  | <input type="checkbox"/>              |
| <b>Sonstige:</b>                         |                          |                                           |                                       |
|                                          | <input type="checkbox"/> | <input type="checkbox"/>                  | <input type="checkbox"/>              |
|                                          | <input type="checkbox"/> | <input type="checkbox"/>                  | <input type="checkbox"/>              |

**D2. Wie werden die Abstandsregelungen (1,5 m) in den Pausenräumen/Kantine umgesetzt?**

|  |
|--|
|  |
|--|

**D3. In welchen Arbeitsbereichen wird der Mindestabstand von 1,5m nicht eingehalten?**

| Arbeitsbereich                                   | Abstand mind. 1,5m       | Abstand weniger als 1,5m | Wenn Abstand <1,5m: Welche Maßnahmen werden ergriffen? |
|--------------------------------------------------|--------------------------|--------------------------|--------------------------------------------------------|
| <b>Anlieferung</b>                               | <input type="checkbox"/> | <input type="checkbox"/> |                                                        |
| <b>Betäubung/<br/>Anschlingen/<br/>Einhängen</b> | <input type="checkbox"/> | <input type="checkbox"/> |                                                        |
| <b>Schlachtung</b>                               | <input type="checkbox"/> | <input type="checkbox"/> |                                                        |
| Schwarzbereich                                   | <input type="checkbox"/> | <input type="checkbox"/> |                                                        |
| Weißbereich                                      | <input type="checkbox"/> | <input type="checkbox"/> |                                                        |
| <b>Zerlegung</b>                                 | <input type="checkbox"/> | <input type="checkbox"/> |                                                        |
| Grobzerlegung                                    | <input type="checkbox"/> | <input type="checkbox"/> |                                                        |
| Feinzerlegung                                    | <input type="checkbox"/> | <input type="checkbox"/> |                                                        |

| Arbeitsbereich                      | Abstand mind. 1,5m       | Abstand weniger als 1,5m | Wenn Abstand <1,5m: Welche Maßnahmen werden ergriffen? |
|-------------------------------------|--------------------------|--------------------------|--------------------------------------------------------|
| Fleischproduktion                   | <input type="checkbox"/> | <input type="checkbox"/> |                                                        |
| Wurstproduktion                     | <input type="checkbox"/> | <input type="checkbox"/> |                                                        |
| Räucherabteilung                    | <input type="checkbox"/> | <input type="checkbox"/> |                                                        |
| Verpackung                          | <input type="checkbox"/> | <input type="checkbox"/> |                                                        |
| Weißbereich                         | <input type="checkbox"/> | <input type="checkbox"/> |                                                        |
| Schwarzbereich                      | <input type="checkbox"/> | <input type="checkbox"/> |                                                        |
| Kommissionierung/<br>Verladung      | <input type="checkbox"/> | <input type="checkbox"/> |                                                        |
| Werkstatt                           | <input type="checkbox"/> | <input type="checkbox"/> |                                                        |
| Reinigung<br>Schlachtung/Produktion | <input type="checkbox"/> | <input type="checkbox"/> |                                                        |
| Verwaltung                          | <input type="checkbox"/> | <input type="checkbox"/> |                                                        |
| <b>Sonstige:</b>                    |                          |                          |                                                        |
|                                     | <input type="checkbox"/> | <input type="checkbox"/> |                                                        |
|                                     | <input type="checkbox"/> | <input type="checkbox"/> |                                                        |

#### D4. In welchen Arbeitsbereichen gab bzw. gibt es eine Tragepflicht für Mund-Nase-Bedeckung?

| Arbeitsbereich                           | Vor Corona               | Nach Corona              |
|------------------------------------------|--------------------------|--------------------------|
| <b>Anlieferung</b>                       | <input type="checkbox"/> | <input type="checkbox"/> |
| <b>Betäubung/ Anschlingen/ Einhängen</b> | <input type="checkbox"/> | <input type="checkbox"/> |
| <b>Schlachtung</b>                       | <input type="checkbox"/> | <input type="checkbox"/> |
| Schwarzbereich                           | <input type="checkbox"/> | <input type="checkbox"/> |
| Weißbereich                              | <input type="checkbox"/> | <input type="checkbox"/> |
| <b>Zerlegung</b>                         | <input type="checkbox"/> | <input type="checkbox"/> |
| Grobzerlegung                            | <input type="checkbox"/> | <input type="checkbox"/> |
| Feinzerlegung                            | <input type="checkbox"/> | <input type="checkbox"/> |
| <b>Fleischproduktion</b>                 | <input type="checkbox"/> | <input type="checkbox"/> |
| <b>Wurstproduktion</b>                   | <input type="checkbox"/> | <input type="checkbox"/> |
| <b>Räucherabteilung</b>                  | <input type="checkbox"/> | <input type="checkbox"/> |
| <b>Verpackung</b>                        | <input type="checkbox"/> | <input type="checkbox"/> |
| Weißbereich                              | <input type="checkbox"/> | <input type="checkbox"/> |
| Schwarzbereich                           | <input type="checkbox"/> | <input type="checkbox"/> |
| <b>Kommissionierung/ Verladung</b>       | <input type="checkbox"/> | <input type="checkbox"/> |
| <b>Werkstatt</b>                         | <input type="checkbox"/> | <input type="checkbox"/> |
| <b>Reinigung Schlachtung/Produktion</b>  | <input type="checkbox"/> | <input type="checkbox"/> |
| <b>Verwaltung</b>                        | <input type="checkbox"/> | <input type="checkbox"/> |
| <b>Sonstige</b>                          |                          |                          |
|                                          | <input type="checkbox"/> | <input type="checkbox"/> |
|                                          | <input type="checkbox"/> | <input type="checkbox"/> |

#### D5. Welche Art von Mund-Nasen-Bedeckung wird aktuell getragen?

|                          |                          |
|--------------------------|--------------------------|
| Medizinischer Mundschutz | <input type="checkbox"/> |
| Einweg-Astro-Haube       | <input type="checkbox"/> |
| FFP2                     | <input type="checkbox"/> |
| Sonstige, und zwar:      | <input type="checkbox"/> |
|                          |                          |

**D6. Beschreiben Sie das Konzept zur Wahrung des Abstandgebotes in Umkleieräumen. Wird es bereits umgesetzt?**

**D7. Gibt es zusätzliche Maßnahmen, um die Anzahl der Kontakte der Mitarbeiter ab dem Einlass am Werkstor herabzusetzen?**

Bitte senden Sie den ausgefüllten Fragebogen an:

[Isabel.Dienstbuehl@bgn.de](mailto:Isabel.Dienstbuehl@bgn.de)

oder

Berufsgenossenschaft Nahrungsmittel und Gastgewerbe  
Präventionsleitung  
Isabel Dienstbühl  
Dynamostr. 7-11  
68165 Mannheim
