# Supplementary material for: Investigation of superspreading COVID-19 outbreak events in meat and poultry processing plants in Germany: A cross-sectional study
Source: PubMed Central journal article supplement (PMC8191887; doi:10.1371/journal.pone.0242456), 2021-06-10
Supplement: pone.0242456.s005.pdf [file pone.0242456.s005.pdf]

---

***Questionnaire for the evaluation of protective  
measures against new infections caused by the  
Corona virus (V3)***

---

**Information on how to conduct the survey**

Different contact persons may need to be involved for individual questions.  
If they cannot provide exact information, tell your contacts that an approximation or estimate of the actual number is better than no indication.

**Thank you for your support!**

**A. Information about the company or the plant**

|                      |  |
|----------------------|--|
| name of the company: |  |
| plant:               |  |
| address:             |  |

## B. Working areas/ employees/ infected people

### B1. Working areas

#### B1.1 How many employees work in following working areas?

*If you are unable to provide precise information, please provide the most accurate estimate possible.*

| Working area                                | Number of employees overall | ... of which are contract workers | Number of shifts per day |
|---------------------------------------------|-----------------------------|-----------------------------------|--------------------------|
| <b>Delivery</b>                             |                             |                                   |                          |
| <b>Anesthesia/ slinging/ hanging</b>        |                             |                                   |                          |
| <b>Slaughter</b>                            |                             |                                   |                          |
| Black area                                  |                             |                                   |                          |
| White area                                  |                             |                                   |                          |
| <b>Deboning and meat cutting area</b>       |                             |                                   |                          |
| Coarse deboning and cutting                 |                             |                                   |                          |
| Fine deboning and cutting                   |                             |                                   |                          |
| <b>Meat production</b>                      |                             |                                   |                          |
| <b>Sausage production</b>                   |                             |                                   |                          |
| <b>Smoking of meat</b>                      |                             |                                   |                          |
| <b>Packaging</b>                            |                             |                                   |                          |
| White area                                  |                             |                                   |                          |
| Black area                                  |                             |                                   |                          |
| <b>Commissioning/ Loading</b>               |                             |                                   |                          |
| <b>Garage</b>                               |                             |                                   |                          |
| <b>Cleaning of slaughter and production</b> |                             |                                   |                          |
| <b>Administration</b>                       |                             |                                   |                          |
| <b>Other work areas</b>                     |                             |                                   |                          |
|                                             |                             |                                   |                          |
|                                             |                             |                                   |                          |
| <b>Sum of the employees:</b>                |                             |                                   |                          |

## B2. Type of employment

### B2.1 How many people work in your company?

*If you are unable to provide precise information, please provide the most accurate estimate possible.*

|                   | Number of employees |
|-------------------|---------------------|
| Regular workers   |                     |
| Contract workers  |                     |
| Temporary workers |                     |

### B2.2 Are there any areas of work where there are no contract workers?

|                       |                   |  |
|-----------------------|-------------------|--|
| <input type="radio"/> | No                |  |
| <input type="radio"/> | Yes, and that is: |  |

### B2.3 How are contract workers/temporary workers accommodated?

*If you are unable to provide precise information, please provide the most accurate estimate possible.*

|                          | Number of employees |
|--------------------------|---------------------|
| Collective accommodation |                     |
| Shared accommodation     |                     |
| Flat, private lease      |                     |

### B2.4 What means of transport do the factory workers /temporary workers use to enter the company (f.e. private arrival / minibus / collective bus / ...)?

|  |
|--|
|  |
|--|

### B3. Infected people

**B3.1 What date did you first hear about an infected employee? How did this information come to you?**

**B3.2 What measures were taken after it became known that there is at least one employee infected with SARS-CoV-2 in the company?**

**If your company has not yet had any infected employees, is there a plan of action and, if so, what does it provide for?**

*Implemented short term: within a few hours or up to 7 days, f.e. quarantine, closure of production lines/departments*

*Implemented long term: within a few weeks implemented, f.e. series testing, retrofit ventilation systems)*

| Type of protective measure | Implement ed short term  | Implement ed long term   | planned                  |
|----------------------------|--------------------------|--------------------------|--------------------------|
|                            | <input type="checkbox"/> | <input type="checkbox"/> | <input type="checkbox"/> |
|                            | <input type="checkbox"/> | <input type="checkbox"/> | <input type="checkbox"/> |
|                            | <input type="checkbox"/> | <input type="checkbox"/> | <input type="checkbox"/> |
|                            | <input type="checkbox"/> | <input type="checkbox"/> | <input type="checkbox"/> |
|                            | <input type="checkbox"/> | <input type="checkbox"/> | <input type="checkbox"/> |

**B3.3 How many infected people are known to the company and in which working areas were they employed?**

| Working area                  | Number of infected people | ... of which are contract workers |
|-------------------------------|---------------------------|-----------------------------------|
| Delivery                      |                           |                                   |
| Anesthesia/ slinging/ hanging |                           |                                   |
| Slaughter                     |                           |                                   |
| Black area                    |                           |                                   |
| White area                    |                           |                                   |

| Working area                                | Number of infected people | ... of which are contract workers |
|---------------------------------------------|---------------------------|-----------------------------------|
| <b>Deboning and meat cutting area</b>       |                           |                                   |
| Coarse deboning and cutting                 |                           |                                   |
| Fine deboning and cutting                   |                           |                                   |
| <b>Meat production</b>                      |                           |                                   |
| <b>Sausage production</b>                   |                           |                                   |
| <b>Smoking of meat</b>                      |                           |                                   |
| <b>Packaging</b>                            |                           |                                   |
| White area                                  |                           |                                   |
| Black area                                  |                           |                                   |
| <b>Commissioning/ Loading</b>               |                           |                                   |
| <b>Garage</b>                               |                           |                                   |
| <b>Cleaning of slaughter and production</b> |                           |                                   |
| <b>Administration</b>                       |                           |                                   |
| <b>Other work areas:</b>                    |                           |                                   |
|                                             |                           |                                   |
|                                             |                           |                                   |

**B3.4 How many infected contract/ temporary workers stay in the following types of accommodation?**

|                                 | Number of infected people |
|---------------------------------|---------------------------|
| <b>Collective accommodation</b> |                           |
| <b>Shared accommodation</b>     |                           |
| <b>Flat, private lease</b>      |                           |

## C. Working environment/ ventilation/ air condition

C1. Which working areas are equipped with a ventilation system with an outdoor air supply?

| Working area                                | ventilation system implemented? | outdoor air flow [m³/h] | air circulation possible? |
|---------------------------------------------|---------------------------------|-------------------------|---------------------------|
| <b>Delivery</b>                             | <input type="checkbox"/>        |                         | <input type="checkbox"/>  |
| <b>Anesthesia/ slinging/ hanging</b>        | <input type="checkbox"/>        |                         | <input type="checkbox"/>  |
| <b>Slaughter</b>                            | <input type="checkbox"/>        |                         | <input type="checkbox"/>  |
| Black area                                  | <input type="checkbox"/>        |                         | <input type="checkbox"/>  |
| White area                                  | <input type="checkbox"/>        |                         | <input type="checkbox"/>  |
| <b>Deboning and meat cutting area</b>       | <input type="checkbox"/>        |                         | <input type="checkbox"/>  |
| Coarse deboning and cutting                 | <input type="checkbox"/>        |                         | <input type="checkbox"/>  |
| Fine deboning and cutting                   | <input type="checkbox"/>        |                         | <input type="checkbox"/>  |
| <b>Meat production</b>                      | <input type="checkbox"/>        |                         | <input type="checkbox"/>  |
| <b>Sausage production</b>                   | <input type="checkbox"/>        |                         | <input type="checkbox"/>  |
| <b>Smoking of meat</b>                      | <input type="checkbox"/>        |                         | <input type="checkbox"/>  |
| <b>Packaging</b>                            | <input type="checkbox"/>        |                         | <input type="checkbox"/>  |
| White area                                  | <input type="checkbox"/>        |                         | <input type="checkbox"/>  |
| Black area                                  | <input type="checkbox"/>        |                         | <input type="checkbox"/>  |
| <b>Commissioning/ Loading</b>               | <input type="checkbox"/>        |                         | <input type="checkbox"/>  |
| <b>Garage</b>                               | <input type="checkbox"/>        |                         |                           |
| <b>Cleaning of slaughter and production</b> | <input type="checkbox"/>        |                         |                           |
| <b>Administration</b>                       | <input type="checkbox"/>        |                         |                           |
| <b>Other work areas:</b>                    |                                 |                         |                           |
|                                             | <input type="checkbox"/>        |                         |                           |
|                                             | <input type="checkbox"/>        |                         |                           |

## C2. Which working areas are cooled to which temperature?

| <b>Working area</b>                         | <b>Temperature [°C]</b> |
|---------------------------------------------|-------------------------|
| <b>Delivery</b>                             |                         |
| <b>Anesthesia/ slinging/ hanging</b>        |                         |
| <b>Slaughter</b>                            |                         |
| Black area                                  |                         |
| White area                                  |                         |
| <b>Deboning and meat cutting area</b>       |                         |
| Coarse deboning and cutting                 |                         |
| Fine deboning and cutting                   |                         |
| <b>Meat production</b>                      |                         |
| <b>Sausage production</b>                   |                         |
| <b>Smoking of meat</b>                      |                         |
| <b>Packaging</b>                            |                         |
| White area                                  |                         |
| Black area                                  |                         |
| <b>Commissioning/ Loading</b>               |                         |
| <b>Garage</b>                               |                         |
| <b>Cleaning of slaughter and production</b> |                         |
| <b>Administration</b>                       |                         |
| <b>Other work areas:</b>                    |                         |
|                                             |                         |
|                                             |                         |

### C3. How is the cooling achieved?

| Working area                                | Decentralized cooled circulating air (Secondary air) | Central cooling of the outdoor air with a ventilation system |                             |
|---------------------------------------------|------------------------------------------------------|--------------------------------------------------------------|-----------------------------|
|                                             |                                                      | without cooled circulating air                               | with cooled circulating air |
| <b>Delivery</b>                             | <input type="checkbox"/>                             | <input type="checkbox"/>                                     | <input type="checkbox"/>    |
| <b>Anesthesia/ slinging/ hanging</b>        | <input type="checkbox"/>                             | <input type="checkbox"/>                                     | <input type="checkbox"/>    |
| <b>Slaughter</b>                            | <input type="checkbox"/>                             | <input type="checkbox"/>                                     | <input type="checkbox"/>    |
| Black area                                  | <input type="checkbox"/>                             | <input type="checkbox"/>                                     | <input type="checkbox"/>    |
| White area                                  | <input type="checkbox"/>                             | <input type="checkbox"/>                                     | <input type="checkbox"/>    |
| <b>Deboning and meat cutting area</b>       | <input type="checkbox"/>                             | <input type="checkbox"/>                                     | <input type="checkbox"/>    |
| Coarse deboning and cutting                 | <input type="checkbox"/>                             | <input type="checkbox"/>                                     | <input type="checkbox"/>    |
| Fine deboning and cutting                   | <input type="checkbox"/>                             | <input type="checkbox"/>                                     | <input type="checkbox"/>    |
| <b>Meat production</b>                      | <input type="checkbox"/>                             | <input type="checkbox"/>                                     | <input type="checkbox"/>    |
| <b>Sausage production</b>                   | <input type="checkbox"/>                             | <input type="checkbox"/>                                     | <input type="checkbox"/>    |
| <b>Smoking of meat</b>                      | <input type="checkbox"/>                             | <input type="checkbox"/>                                     | <input type="checkbox"/>    |
| <b>Packaging</b>                            | <input type="checkbox"/>                             | <input type="checkbox"/>                                     | <input type="checkbox"/>    |
| White area                                  | <input type="checkbox"/>                             | <input type="checkbox"/>                                     | <input type="checkbox"/>    |
| Black area                                  | <input type="checkbox"/>                             | <input type="checkbox"/>                                     | <input type="checkbox"/>    |
| <b>Commissioning/ Loading</b>               | <input type="checkbox"/>                             | <input type="checkbox"/>                                     | <input type="checkbox"/>    |
| <b>Garage</b>                               | <input type="checkbox"/>                             | <input type="checkbox"/>                                     | <input type="checkbox"/>    |
| <b>Cleaning of slaughter and production</b> | <input type="checkbox"/>                             | <input type="checkbox"/>                                     | <input type="checkbox"/>    |
| <b>Administration</b>                       | <input type="checkbox"/>                             | <input type="checkbox"/>                                     | <input type="checkbox"/>    |
| <b>Other work area:</b>                     |                                                      |                                                              |                             |
|                                             | <input type="checkbox"/>                             | <input type="checkbox"/>                                     | <input type="checkbox"/>    |



| Working area | Decentralized cooled circulating air (Secondary air) | Central cooling of the outdoor air with a ventilation system |                             |
|--------------|------------------------------------------------------|--------------------------------------------------------------|-----------------------------|
|              |                                                      | without cooled circulating air                               | with cooled circulating air |
|              | <input type="checkbox"/>                             | <input type="checkbox"/>                                     | <input type="checkbox"/>    |

#### C4. What technology is used to clean the cooled circulating air?

| Working area                          | Decentralized cooled circulating air (Secondary air) |                          | cooled circulating air of the ventilation system |                          | separate circulating air disinfection |                          |
|---------------------------------------|------------------------------------------------------|--------------------------|--------------------------------------------------|--------------------------|---------------------------------------|--------------------------|
|                                       | Filtration (if so, which?)                           | UVC                      | Filtration (if so, which?)                       | UVC                      | Filtration (if so, which?)            | UVC                      |
| <b>Deboning and meat cutting area</b> | <input type="checkbox"/>                             | <input type="checkbox"/> | <input type="checkbox"/>                         | <input type="checkbox"/> | <input type="checkbox"/>              | <input type="checkbox"/> |
| Coarse deboning and cutting           | <input type="checkbox"/>                             | <input type="checkbox"/> | <input type="checkbox"/>                         | <input type="checkbox"/> | <input type="checkbox"/>              | <input type="checkbox"/> |
| Fine deboning and cutting             | <input type="checkbox"/>                             | <input type="checkbox"/> | <input type="checkbox"/>                         | <input type="checkbox"/> | <input type="checkbox"/>              | <input type="checkbox"/> |
| <b>Meat production</b>                | <input type="checkbox"/>                             | <input type="checkbox"/> | <input type="checkbox"/>                         | <input type="checkbox"/> | <input type="checkbox"/>              | <input type="checkbox"/> |
| <b>Sausage production</b>             | <input type="checkbox"/>                             | <input type="checkbox"/> | <input type="checkbox"/>                         | <input type="checkbox"/> | <input type="checkbox"/>              | <input type="checkbox"/> |
| <b>Packaging</b>                      | <input type="checkbox"/>                             | <input type="checkbox"/> | <input type="checkbox"/>                         | <input type="checkbox"/> | <input type="checkbox"/>              | <input type="checkbox"/> |
| White area                            | <input type="checkbox"/>                             | <input type="checkbox"/> | <input type="checkbox"/>                         | <input type="checkbox"/> | <input type="checkbox"/>              | <input type="checkbox"/> |
| Black area                            | <input type="checkbox"/>                             | <input type="checkbox"/> | <input type="checkbox"/>                         | <input type="checkbox"/> | <input type="checkbox"/>              | <input type="checkbox"/> |

#### C5. How are the following rooms ventilated?

|  | ventilation system | Natural ventilation (windows, doors) |
|--|--------------------|--------------------------------------|
|  |                    |                                      |

|                       |                          |                          |
|-----------------------|--------------------------|--------------------------|
| <b>Canteen</b>        | <input type="checkbox"/> | <input type="checkbox"/> |
| <b>Break rooms</b>    | <input type="checkbox"/> | <input type="checkbox"/> |
| <b>Changing rooms</b> | <input type="checkbox"/> | <input type="checkbox"/> |
| <b>Sanitary rooms</b> | <input type="checkbox"/> | <input type="checkbox"/> |

## D. Organizational and personal protective measures

### D1. For which work areas are there fixed break times?

| Working area                                | No fixed break time      | Fixed break time, <u>not</u> time shifted | Fixed break time, time shifted |
|---------------------------------------------|--------------------------|-------------------------------------------|--------------------------------|
| <b>Delivery</b>                             | <input type="checkbox"/> | <input type="checkbox"/>                  | <input type="checkbox"/>       |
| <b>Anesthesia/ slinging/ hanging</b>        | <input type="checkbox"/> | <input type="checkbox"/>                  | <input type="checkbox"/>       |
| <b>Slaughter</b>                            | <input type="checkbox"/> | <input type="checkbox"/>                  | <input type="checkbox"/>       |
| Black area                                  | <input type="checkbox"/> | <input type="checkbox"/>                  | <input type="checkbox"/>       |
| White area                                  | <input type="checkbox"/> | <input type="checkbox"/>                  | <input type="checkbox"/>       |
| <b>Deboning and meat cutting area</b>       | <input type="checkbox"/> | <input type="checkbox"/>                  | <input type="checkbox"/>       |
| Coarse deboning and cutting                 | <input type="checkbox"/> | <input type="checkbox"/>                  | <input type="checkbox"/>       |
| Fine deboning and cutting                   | <input type="checkbox"/> | <input type="checkbox"/>                  | <input type="checkbox"/>       |
| <b>Meat production</b>                      | <input type="checkbox"/> | <input type="checkbox"/>                  | <input type="checkbox"/>       |
| <b>Sausage production</b>                   | <input type="checkbox"/> | <input type="checkbox"/>                  | <input type="checkbox"/>       |
| <b>Smoking of meat</b>                      | <input type="checkbox"/> | <input type="checkbox"/>                  | <input type="checkbox"/>       |
| <b>Packaging</b>                            | <input type="checkbox"/> | <input type="checkbox"/>                  | <input type="checkbox"/>       |
| White area                                  | <input type="checkbox"/> | <input type="checkbox"/>                  | <input type="checkbox"/>       |
| Black area                                  | <input type="checkbox"/> | <input type="checkbox"/>                  | <input type="checkbox"/>       |
| <b>Commissioning/ Loading</b>               | <input type="checkbox"/> | <input type="checkbox"/>                  | <input type="checkbox"/>       |
| <b>Garage</b>                               | <input type="checkbox"/> | <input type="checkbox"/>                  | <input type="checkbox"/>       |
| <b>Cleaning of slaughter and production</b> | <input type="checkbox"/> | <input type="checkbox"/>                  | <input type="checkbox"/>       |
| <b>Administration</b>                       | <input type="checkbox"/> | <input type="checkbox"/>                  | <input type="checkbox"/>       |
| <b>Other work areas:</b>                    |                          |                                           |                                |
|                                             | <input type="checkbox"/> | <input type="checkbox"/>                  | <input type="checkbox"/>       |
|                                             | <input type="checkbox"/> | <input type="checkbox"/>                  | <input type="checkbox"/>       |

**D2. How are the distance controls (1.5 m) implemented in the break rooms/canteen?**

**D3. In which working areas the minimum distance of 1,5m is not observed?**

| Working area                   | Distance min. 1,5m       | Distance less than 1,5m  | If distance <1,5m: Which protective measure are being taken? |
|--------------------------------|--------------------------|--------------------------|--------------------------------------------------------------|
| Delivery                       | <input type="checkbox"/> | <input type="checkbox"/> |                                                              |
| Anesthesia/ slinging/ hanging  | <input type="checkbox"/> | <input type="checkbox"/> |                                                              |
| Slaughter                      | <input type="checkbox"/> | <input type="checkbox"/> |                                                              |
| Black area                     | <input type="checkbox"/> | <input type="checkbox"/> |                                                              |
| White area                     | <input type="checkbox"/> | <input type="checkbox"/> |                                                              |
| Deboning and meat cutting area | <input type="checkbox"/> | <input type="checkbox"/> |                                                              |
| Coarse deboning and cutting    | <input type="checkbox"/> | <input type="checkbox"/> |                                                              |
| Fine deboning and cutting      | <input type="checkbox"/> | <input type="checkbox"/> |                                                              |
| Meat production                | <input type="checkbox"/> | <input type="checkbox"/> |                                                              |

| Working area                            | Distance min. 1,5m       | Distance less than 1,5m  | If distance <1,5m: Which protective measure are being taken? |
|-----------------------------------------|--------------------------|--------------------------|--------------------------------------------------------------|
| Sausage production                      | <input type="checkbox"/> | <input type="checkbox"/> |                                                              |
| Smoking of meat                         | <input type="checkbox"/> | <input type="checkbox"/> |                                                              |
| Packaging                               | <input type="checkbox"/> | <input type="checkbox"/> |                                                              |
| White area                              | <input type="checkbox"/> | <input type="checkbox"/> |                                                              |
| Black area                              | <input type="checkbox"/> | <input type="checkbox"/> |                                                              |
| Commissioning/<br>Loading               | <input type="checkbox"/> | <input type="checkbox"/> |                                                              |
| Garage                                  | <input type="checkbox"/> | <input type="checkbox"/> |                                                              |
| Cleaning of slaughter<br>and production | <input type="checkbox"/> | <input type="checkbox"/> |                                                              |
| Administration                          | <input type="checkbox"/> | <input type="checkbox"/> |                                                              |
| <b>Other work areas:</b>                |                          |                          |                                                              |
|                                         | <input type="checkbox"/> | <input type="checkbox"/> |                                                              |
|                                         | <input type="checkbox"/> | <input type="checkbox"/> |                                                              |

**D4. In which working areas do the company has an obligation to carry a mouth-nose cover?**

| Working areas                               | Before Corona            | After Corona             |
|---------------------------------------------|--------------------------|--------------------------|
| <b>Delivery</b>                             | <input type="checkbox"/> | <input type="checkbox"/> |
| <b>Anesthesia/ slinging/ hanging</b>        | <input type="checkbox"/> | <input type="checkbox"/> |
| <b>Slaughter</b>                            | <input type="checkbox"/> | <input type="checkbox"/> |
| Black area                                  | <input type="checkbox"/> | <input type="checkbox"/> |
| White area                                  | <input type="checkbox"/> | <input type="checkbox"/> |
| <b>Deboning and meat cutting area</b>       | <input type="checkbox"/> | <input type="checkbox"/> |
| Coarse deboning and cutting                 | <input type="checkbox"/> | <input type="checkbox"/> |
| Fine deboning and cutting                   | <input type="checkbox"/> | <input type="checkbox"/> |
| <b>Meat production</b>                      | <input type="checkbox"/> | <input type="checkbox"/> |
| <b>Sausage production</b>                   | <input type="checkbox"/> | <input type="checkbox"/> |
| <b>Smoking of meat</b>                      | <input type="checkbox"/> | <input type="checkbox"/> |
| <b>Packaging</b>                            | <input type="checkbox"/> | <input type="checkbox"/> |
| White area                                  | <input type="checkbox"/> | <input type="checkbox"/> |
| Black area                                  | <input type="checkbox"/> | <input type="checkbox"/> |
| <b>Commissioning/ Loading</b>               | <input type="checkbox"/> | <input type="checkbox"/> |
| <b>Garage</b>                               | <input type="checkbox"/> | <input type="checkbox"/> |
| <b>Cleaning of slaughter and production</b> | <input type="checkbox"/> | <input type="checkbox"/> |
| <b>Administration</b>                       | <input type="checkbox"/> | <input type="checkbox"/> |
| <b>Other work areas:</b>                    |                          |                          |
|                                             | <input type="checkbox"/> | <input type="checkbox"/> |
|                                             | <input type="checkbox"/> | <input type="checkbox"/> |

**D5. What kind of face covering is currently worn?**

|                              |                          |
|------------------------------|--------------------------|
| Medical face covering        | <input type="checkbox"/> |
| Astronaut cap with face mask | <input type="checkbox"/> |
| FFP2 mask                    | <input type="checkbox"/> |
| Other:                       | <input type="checkbox"/> |
|                              |                          |

**D6. Describe the concept of maintaining distance in changing rooms. Is it already being implemented?**

**D7. Are there any additional measures to reduce the number of contacts between employees at the factory entrance?**

Please send the completed questionnaire to following address:

[Isabel.Dienstbuehl@bgn.de](mailto:Isabel.Dienstbuehl@bgn.de)

or

Berufsgenossenschaft Nahrungsmittel und Gastgewerbe  
Präventionsleitung  
Isabel Dienstbühl  
Dynamostr. 7-11  
68165 Mannheim
